# Supplementary material for: Substandard and falsified antibiotics: neglected drivers of antimicrobial resistance?
Source: HighWire-hosted journal article supplement (doi:10.1136/bmjgh-2022-008587), 2022-08-01

## Substandard and falsified antibiotics: neglected drivers of antimicrobial resistance?

Supplementary file 7. Failure frequency of antibiotics by country, region and AWaRe group in prevalence surveys included in the review\*.

| Country/Region                   | Income | AWaRe group | AMC**[1]      | Data points | Failed samples | Total samples | % FF        |
|----------------------------------|--------|-------------|---------------|-------------|----------------|---------------|-------------|
| <b>Africa</b>                    |        |             |               | <b>267</b>  | <b>1,090</b>   | <b>3,836</b>  | <b>28.4</b> |
| Burkina Faso                     | LIC    | ACCESS      | 10.4          | 3           | 2              | 7             | 28.6        |
|                                  |        | WATCH       | 3.3           | 1           | 0              | 3             | 0.0         |
| Cameroon                         | LMIC   | ACCESS      | Not available | 24          | 136            | 436           | 31.2        |
|                                  |        | WATCH       | Not available | 1           | 2              | 25            | 8.0         |
| Chad                             | LIC    | ACCESS      | Not available | 7           | 3              | 19            | 15.8        |
|                                  |        | WATCH       | Not available | n/a         | n/a            | n/a           | n/a         |
| Côte d'Ivoire                    | LMIC   | ACCESS      | 8.8           | 4           | 33             | 65            | 50.8        |
|                                  |        | WATCH       | 1.7           | n/a         | n/a            | n/a           | n/a         |
| Democratic Republic of the Congo | LIC    | ACCESS      | Not available | 13          | 96             | 495           | 19.4        |
|                                  |        | WATCH       | Not available | 2           | 6              | 43            | 14.0        |
| Ethiopia                         | LIC    | ACCESS      | Not available | 2           | 0              | 2             | 0.0         |
|                                  |        | WATCH       | Not available | n/a         | n/a            | n/a           | n/a         |
| Ghana                            | LMIC   | ACCESS      | Not available | 19          | 202            | 332           | 60.8        |
|                                  |        | WATCH       | Not available | 8           | 88             | 119           | 74.0        |
| Kenya                            | LMIC   | ACCESS      | Not available | 16          | 83             | 430           | 19.3        |
|                                  |        | WATCH       | Not available | 2           | 1              | 6             | 16.7        |
| Madagascar                       | LIC    | ACCESS      | Not available | 10          | 14             | 59            | 23.7        |
|                                  |        | WATCH       | Not available | 1           | 0              | 3             | 0.0         |
| Malawi                           | LIC    | ACCESS      | Not available | 6           | 8              | 70            | 11.4        |
|                                  |        | WATCH       | Not available | 2           | 0              | 6             | 0.0         |
| Mali                             | LIC    | ACCESS      | Not available | 2           | 2              | 20            | 10.0        |
|                                  |        | WATCH       | Not available | 1           | 4              | 10            | 40.0        |
| Niger                            | LIC    | ACCESS      | Not available | 8           | 14             | 32            | 43.8        |
|                                  |        | WATCH       | Not available | 1           | 0              | 1             | 0.0         |

|                 |      |        |               |           |            |            |             |
|-----------------|------|--------|---------------|-----------|------------|------------|-------------|
| Nigeria         | LMIC | ACCESS | Not available | 37        | 252        | 544        | 46.3        |
|                 |      | WATCH  | Not available | 6         | 46         | 88         | 52.3        |
| Rwanda          | LIC  | ACCESS | Not available | 3         | 1          | 8          | 12.5        |
|                 |      | WATCH  | Not available | n/a       | n/a        | n/a        | n/a         |
| Senegal         | LMIC | ACCESS | Not available | 7         | 31         | 69         | 44.9        |
|                 |      | WATCH  | Not available | 2         | 6          | 12         | 50.0        |
| Sierra Leone    | LIC  | ACCESS | Not available | 1         | 0          | 9          | 0.0         |
|                 |      | WATCH  | Not available | n/a       | n/a        | n/a        | n/a         |
| South Africa    | UMIC | ACCESS | Not available | 7         | 25         | 186        | 13.4        |
|                 |      | WATCH  | Not available | n/a       | n/a        | n/a        | n/a         |
| Sudan           | LIC  | ACCESS | 23.1          | 2         | 0          | 6          | 0.0         |
|                 |      | WATCH  | 6.1           | 2         | 1          | 5          | 20.0        |
| Tanzania        | LMIC | ACCESS | 15.3          | 12        | 10         | 182        | 5.5         |
|                 |      | WATCH  | 6.1           | 2         | 0          | 11         | 0.0         |
| Togo            | LIC  | ACCESS | Not available | 21        | 3          | 51         | 5.9         |
|                 |      | WATCH  | Not available | 4         | 3          | 13         | 23.1        |
| Uganda          | LIC  | ACCESS | Not available | 6         | 2          | 12         | 16.7        |
|                 |      | WATCH  | Not available | 1         | 0          | 3          | 0.0         |
| Zimbabwe        | LMIC | ACCESS | Not available | 19        | 16         | 450        | 3.6         |
|                 |      | WATCH  |               | 2         | 0          | 4          | 0.0         |
| <b>Americas</b> |      |        |               | <b>31</b> | <b>112</b> | <b>898</b> | <b>12.5</b> |
| Argentina       | UMIC | ACCESS | Not available | n/a       | n/a        | n/a        | n/a         |
|                 |      | WATCH  | Not available | 1         | 2          | 75         | 2.7         |
| Belize          | LMIC | ACCESS | Not available | 2         | 7          | 12         | 58.3        |
|                 |      | WATCH  | Not available | 1         | 5          | 5          | 100.0       |
| Bolivia         | LMIC | ACCESS | 15.1          | n/a       | n/a        | n/a        | n/a         |
|                 |      | WATCH  | 4.4           | 1         | 3          | 34         | 8.8         |
| Brazil          | UMIC | ACCESS | 14.7          | n/a       | n/a        | n/a        | n/a         |
|                 |      | WATCH  | 6.7           | 1         | 6          | 157        | 3.8         |
| Ecuador         | UMIC | ACCESS | Not available | n/a       | n/a        | n/a        | n/a         |
|                 |      | WATCH  | Not available | 1         | 2          | 43         | 4.7         |
| Guatemala       | UMIC | ACCESS | Not available | n/a       | n/a        | n/a        | n/a         |

|               |      |                  |               |            |            |              |             |
|---------------|------|------------------|---------------|------------|------------|--------------|-------------|
|               |      | <i>WATCH</i>     | Not available | 1          | 4          | 52           | 7.7         |
| Haiti         | LMIC | <i>ACCESS</i>    | Not available | 6          | 28         | 153          | 18.3        |
|               |      | <i>WATCH</i>     | Not available | 4          | 17         | 27           | 63.0        |
| Honduras      | LMIC | <i>ACCESS</i>    | Not available | n/a        | n/a        | n/a          | n/a         |
|               |      | <i>WATCH</i>     | Not available | 1          | 3          | 45           | 6.7         |
| Mexico        | UMIC | <i>ACCESS</i>    | Not available | 4          | 6          | 9            | 66.7        |
|               |      | <i>WATCH</i>     | Not available | 1          | 0          | 2            | 0.0         |
| Paraguay      | UMIC | <i>ACCESS</i>    | 8.7           | n/a        | n/a        | n/a          | n/a         |
|               |      | <i>WATCH</i>     | 10.3          | 1          | 14         | 111          | 12.6        |
| Peru          | UMIC | <i>ACCESS</i>    | 7.2           | n/a        | n/a        | n/a          | n/a         |
|               |      | <i>WATCH</i>     | 3.0           | 1          | 4          | 56           | 7.1         |
| United States | HIC  | <i>ACCESS</i>    | Not available | 3          | 1          | 3            | 33.3        |
|               |      | <i>WATCH</i>     | Not available | n/a        | n/a        | n/a          | n/a         |
| Uruguay       | HIC  | <i>ACCESS</i>    | Not available | n/a        | n/a        | n/a          | n/a         |
|               |      | <i>WATCH</i>     | Not available | 1          | 4          | 78           | 5.1         |
| Venezuela     | N/A  | <i>ACCESS</i>    | Not available | n/a        | n/a        | n/a          | n/a         |
|               |      | <i>WATCH</i>     | Not available | 1          | 6          | 36           | 16.7        |
| <b>Asia</b>   |      |                  |               | <b>185</b> | <b>932</b> | <b>6,202</b> | <b>15.0</b> |
| Afghanistan   | LIC  | <i>ACCESS</i>    | Not available | 2          | 2          | 74           | 2.7         |
|               |      | <i>WATCH</i>     | Not available | 2          | 3          | 51           | 5.9         |
| Armenia       | UMIC | <i>ACCESS</i>    | Not available | n/a        | n/a        | n/a          | n/a         |
|               |      | <i>WATCH</i>     | Not available | 2          | 1          | 24           | 4.2         |
| Azerbaijan    | UMIC | <i>ACCESS</i>    | Not available | n/a        | n/a        | n/a          | n/a         |
|               |      | <i>WATCH</i>     | Not available | 2          | 0          | 10           | 0.0         |
| Bangladesh    | LMIC | <i>ACCESS</i>    | Not available | 5          | 31         | 69           | 44.9        |
|               |      | <i>WATCH</i>     | Not available | 3          | 17         | 20           | 85.0        |
| Cambodia      | LMIC | <i>ACCESS</i>    | Not available | 19         | 125        | 697          | 17.9        |
|               |      | <i>WATCH</i>     | Not available | 9          | 106        | 502          | 21.1        |
|               |      | <i>Non-AWARE</i> | Not available | 1          | 6          | 9            | 66.7        |
| China         | UMIC | <i>ACCESS</i>    | Not available | 1          | 0          | 3            | 0.0         |
|               |      | <i>WATCH</i>     | Not available | n/a        | n/a        | n/a          | n/a         |
| India         | LMIC | <i>ACCESS</i>    | Not available | 11         | 17         | 380          | 4.5         |

|                                  |      |               |               |          |          |           |            |
|----------------------------------|------|---------------|---------------|----------|----------|-----------|------------|
|                                  |      | <i>WATCH</i>  | Not available | 16       | 69       | 675       | 10.2       |
| Indonesia                        | LMIC | <i>ACCESS</i> | Not available | 4        | 19       | 85        | 22.4       |
|                                  |      | <i>WATCH</i>  | Not available | 1        | 0        | 19        | 0.0        |
| Kazakhstan                       | UMIC | <i>ACCESS</i> | Not available | 1        | 0        | 3         | 0.0        |
|                                  |      | <i>WATCH</i>  | Not available | 6        | 4        | 32        | 12.5       |
| Lao People's Democratic Republic | LMIC | <i>ACCESS</i> | Not available | 22       | 289      | 1242      | 23.3       |
|                                  |      | <i>WATCH</i>  | Not available | 3        | 8        | 92        | 8.7        |
| Mongolia                         | LMIC | <i>ACCESS</i> | 46.2          | 12       | 85       | 935       | 9.1        |
|                                  |      | <i>WATCH</i>  | 18.1          | 1        | 17       | 118       | 14.4       |
| Myanmar                          | LMIC | <i>ACCESS</i> | Not available | 11       | 28       | 193       | 14.5       |
|                                  |      | <i>WATCH</i>  | Not available | 7        | 57       | 202       | 28.2       |
| Nepal                            | LMIC | <i>ACCESS</i> | Not available | 5        | 2        | 8         | 25.0       |
|                                  |      | <i>WATCH</i>  | Not available | 1        | 0        | 3         | 0.0        |
| Pakistan                         | LMIC | <i>ACCESS</i> | Not available | n/a      | n/a      | n/a       | n/a        |
|                                  |      | <i>WATCH</i>  | Not available | 4        | 17       | 108       | 15.7       |
| Saudi Arabia                     | HIC  | <i>ACCESS</i> | Not available | 1        | 9        | 83        | 10.8       |
|                                  |      | <i>WATCH</i>  | Not available | n/a      | n/a      | n/a       | n/a        |
| Tajikistan                       | LMIC | <i>ACCESS</i> | Not available | 3        | 2        | 9         | 22.2       |
|                                  |      | <i>WATCH</i>  | Not available | 1        | 0        | 3         | 0.0        |
| Thailand                         | UMIC | <i>ACCESS</i> | Not available | 8        | 3        | 331       | 0.9        |
|                                  |      | <i>WATCH</i>  | Not available | n/a      | n/a      | n/a       | n/a        |
| Uzbekistan                       | LMIC | <i>ACCESS</i> | Not available | n/a      | n/a      | n/a       | n/a        |
|                                  |      | <i>WATCH</i>  | Not available | 2        | 0        | 15        | 0.0        |
| Viet Nam                         | LMIC | <i>ACCESS</i> | Not available | 10       | 12       | 177       | 6.8        |
|                                  |      | <i>WATCH</i>  | Not available | 4        | 0        | 6         | 0.0        |
| Unknown***                       |      | <i>ACCESS</i> | Not available | 5        | 12       | 32        | 43.8       |
|                                  |      | <i>WATCH</i>  | Not available | n/a      | n/a      | n/a       | n/a        |
| <b>Europe</b>                    |      |               |               | <b>9</b> | <b>5</b> | <b>65</b> | <b>7.7</b> |
| Belarus                          | UMIC | <i>ACCESS</i> | 9.8           | n/a      | n/a      | n/a       | n/a        |
|                                  |      | <i>WATCH</i>  | 6.3           | 2        | 3        | 24        | 12.5       |
| Estonia                          | HIC  | <i>ACCESS</i> | 6.7           | 1        | 0        | 4         | 0.0        |
|                                  |      | <i>WATCH</i>  | 3.6           | n/a      | n/a      | n/a       | n/a        |

|                     |      |           |               |     |     |      |      |
|---------------------|------|-----------|---------------|-----|-----|------|------|
| Germany             | HIC  | ACCESS    | 5.7           | 1   | 0   | 1    | 0.0  |
|                     |      | WATCH     | 3.0           | n/a | n/a | n/a  | n/a  |
| Russian Federation  | UMIC | ACCESS    | 7.1           | 1   | 2   | 4    | 50.0 |
|                     |      | WATCH     | 6.5           | n/a | n/a | n/a  | n/a  |
| Ukraine             | LMIC | ACCESS    | Not available | n/a | n/a | n/a  | n/a  |
|                     |      | WATCH     | Not available | 2   | 0   | 23   | 0.0  |
| United Kingdom      | HIC  | ACCESS    | 13.2          | 2   | 0   | 9    | 0.0  |
|                     |      | WATCH     | 4.2           | n/a | n/a | n/a  | n/a  |
| <b>Oceania</b>      |      |           |               | 14  | 15  | 100  | 15.0 |
| Papua New Guinea    | LMIC | ACCESS    | Not available | 3   | 9   | 67   | 13.4 |
|                     |      | WATCH     | Not available | n/a | n/a | n/a  | n/a  |
| Unknown****         |      | ACCESS    | Not available | 10  | 5   | 30   | 16.7 |
|                     |      | WATCH     | Not available | 1   | 0   | 3    | 0.0  |
| <b>Unknown*****</b> |      | ACCESS    |               | 12  | 6   | 257  | 2.3  |
|                     |      | WATCH     |               | 15  | 189 | 2188 | 8.6  |
|                     |      | Non-AWARE |               | 1   | 0   | 1    | 0.0  |

HIC: High income, LIC: Low income, UMIC: Upper middle income, LMIC: Lower middle

\* Due to the limited number of samples tested for quality in the studies included in this review, the figures should not be interpreted as representative of the prevalence of specific SF antibiotics (please refer to the discussion section of the article for more details).

\*\* Median Antimicrobial Consumption (AMC) between 2016-2018, in Defined Daily Doses per 1,000 inhabitants per day (DID).

\*\*\* Multicountry study (Egypt, Jordan, Lebanon, Saudi Arabia) with no breakdown of the results by country

\*\*\*\* Multicountry study (Papua New Guinea, Solomon Islands, Vanuatu) with no breakdown of the results by country

\*\*\*\*\* Aggregated data without further details of continent and/or countries

Source of AMD data = World Health Organization. WHO report on surveillance of antibiotic consumption: 2016-2018 early implementation. 2018;:1-127. [https://www.who.int/medicines/areas/rational\\_use/oms-amr-amc-report-2016-2018/en/](https://www.who.int/medicines/areas/rational_use/oms-amr-amc-report-2016-2018/en/) (accessed 8 Sep 2019).

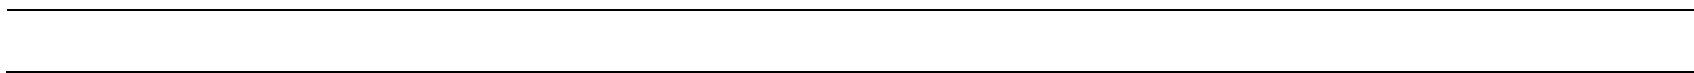

Supplement: bmjgh-2022-008587supp007_data_supplement.pdf [file bmjgh-2022-008587supp007_data_supplement.pdf]
