# Supplementary material for: Substandard and falsified antibiotics: neglected drivers of antimicrobial resistance?
Source: HighWire-hosted journal article supplement (doi:10.1136/bmjgh-2022-008587), 2022-08-01
Supplement: bmjgh-2022-008587supp002_data_supplement.pdf [file bmjgh-2022-008587supp002_data_supplement.pdf]

## Substandard and falsified antibiotics: neglected drivers of antimicrobial resistance?

### Supplementary file 2: Types of studies included in the review and definitions

|                           |                                           |                                                                                                                                                                                                                                                                    |
|---------------------------|-------------------------------------------|--------------------------------------------------------------------------------------------------------------------------------------------------------------------------------------------------------------------------------------------------------------------|
| <b>Scientific reports</b> | Quality control                           | Study in which samples were collected to be analyzed in routine post marketing surveillance by a MRA or a laboratory mandated by a MRA                                                                                                                             |
|                           | Prevalence survey                         | Study in which samples were collected within the pharmaceutical supply chain to assess their quality, in order to describe the prevalence of circulating SF medicines                                                                                              |
|                           | Equivalence study                         | Study to assess the quality of different marketed brands of the same API(s) assuming that the results of the collected samples would represent the quality of the brand as a whole and not an estimate of the frequency of individual samples of different quality |
|                           | Analysis technique development/validation | Study in which samples are assembled in a laboratory to answer a chemical, rather than an epidemiological question (mostly for the development of a new quality technique)                                                                                         |
|                           | Stability study                           | Study in which quality test is performed on medicines subjected to various storage conditions                                                                                                                                                                      |
|                           | Bioavailability study                     | Study of the <i>in vivo</i> bioavailability, i.e. testing for adequate body tissue concentration including the rate and extent to which drug reaches the body tissue compartment                                                                                   |
| <b>Other reports</b>      | Recall/warning/alert                      | Recall/Warning/Alert of products by manufacturers via MRA or by MRAs directly, or by WHO rapid alert                                                                                                                                                               |
|                           | Case reports                              | Patients not responding to medicines or adverse drug reaction where the quality of the medicine was suspected as the cause. Also includes samples analyzed for quality not included in a scientific study.                                                         |
|                           | Seizure                                   | Confiscations by police or MRA                                                                                                                                                                                                                                     |

**Note:** API, Active Pharmaceutical Ingredient; MRA, Medicines Regulatory Agency; WHO, World Health Organization
