# Supplementary material for: Substandard and falsified antibiotics: neglected drivers of antimicrobial resistance?
Source: HighWire-hosted journal article supplement (doi:10.1136/bmjgh-2022-008587), 2022-08-01

## Substandard and falsified antibiotics: neglected drivers of antimicrobial resistance?

Supplementary file 4. PRISMA flow diagram of the selection process of the publications on antibiotic quality.

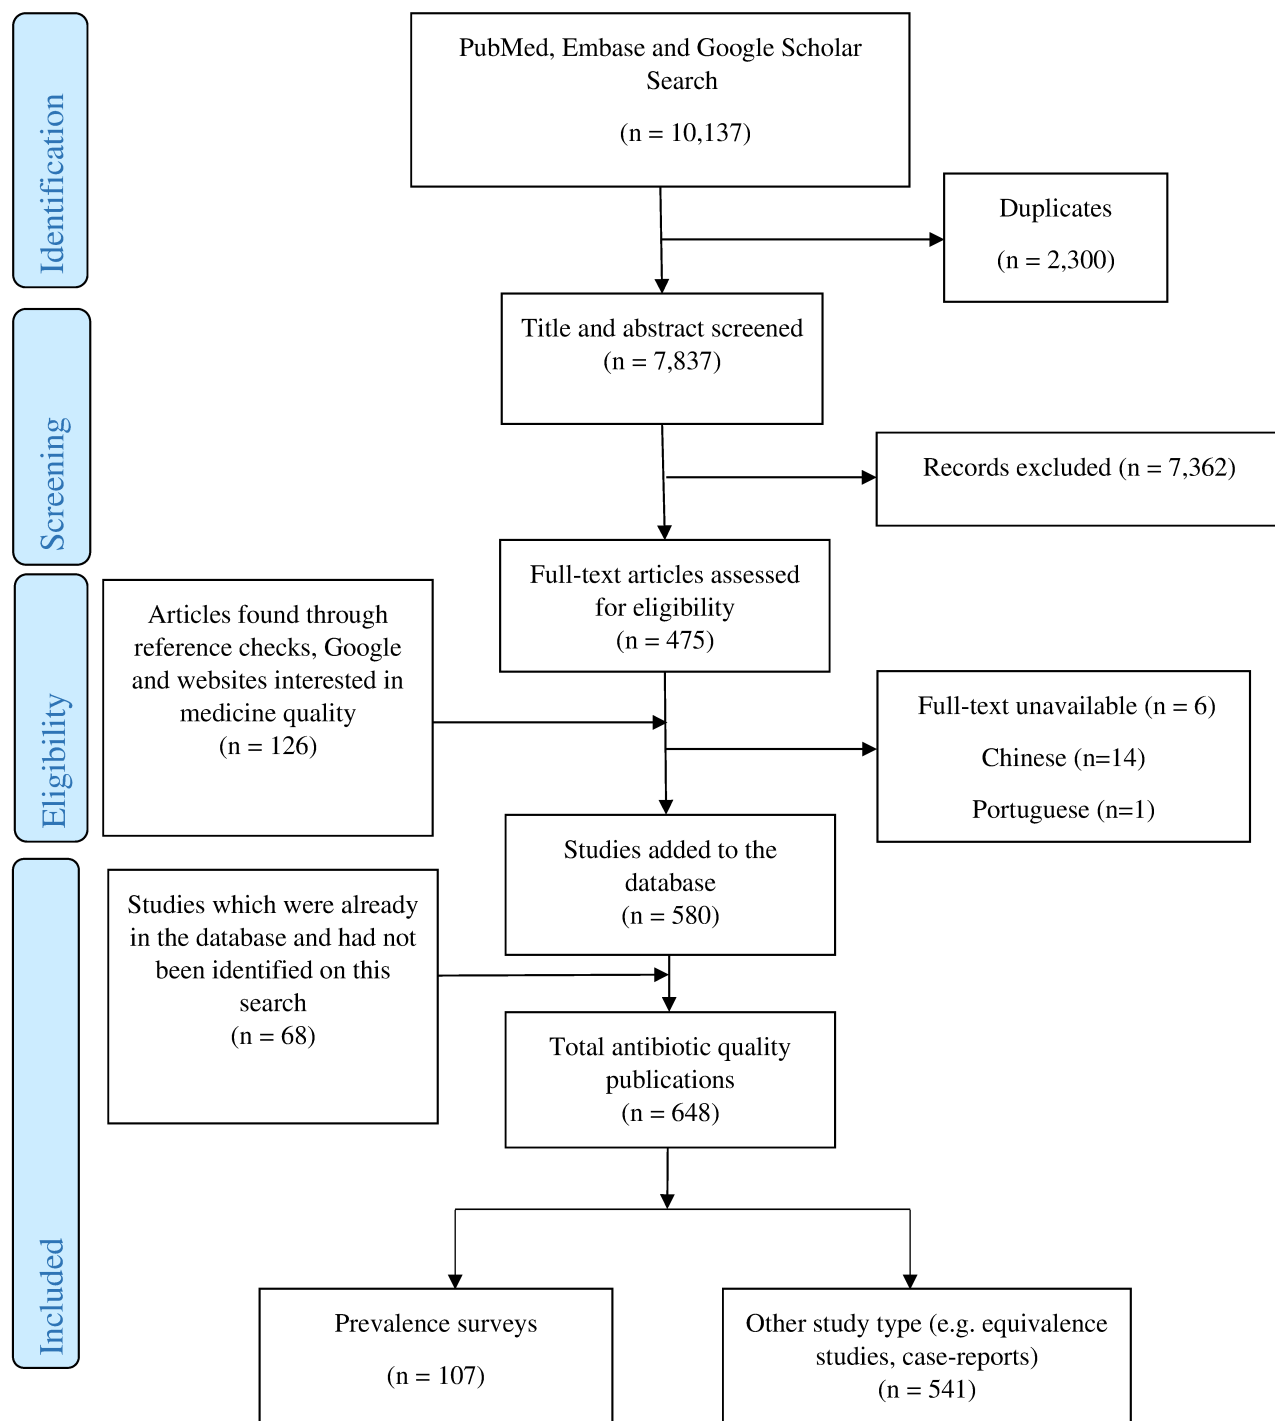

Supplement: bmjgh-2022-008587supp004_data_supplement.pdf [file bmjgh-2022-008587supp004_data_supplement.pdf]
