# Supplementary material for: Substandard and falsified antibiotics: neglected drivers of antimicrobial resistance?
Source: HighWire-hosted journal article supplement (doi:10.1136/bmjgh-2022-008587), 2022-08-01
Supplement: bmjgh-2022-008587supp009_data_supplement.pdf [file bmjgh-2022-008587supp009_data_supplement.pdf]

**Substandard and falsified antibiotics: neglected drivers of antimicrobial resistance?**Supplementary file 9. Failure frequency per type of quality test by API in prevalence surveys of antibiotic quality\*.

Colour gradient: grey (no data), orange (<20% FF), light red (21-40% FF), red (41-70% FF), brown (>70% FF).

**Type of defect % (n/N)**

| API name                               | API Content            | API ID & Semi-quantitation | Dissolution        | Impurities/contaminant/related substance | Uniformity of units | Packaging/label/physical appearance inspection | Other physical analysis*** | Other chemical analysis**** |
|----------------------------------------|------------------------|----------------------------|--------------------|------------------------------------------|---------------------|------------------------------------------------|----------------------------|-----------------------------|
| <b>Total</b>                           | 16.5<br>(1,701/10,307) | 7.5 (210/2,783)            | 9.1<br>(296/3,261) | 3.5<br>(12/346)                          | 6.5<br>(255/3,916)  | 2.8<br>(129/4,612)                             | 2.2 (71/3,290)             | 4.4 (187/4,212)             |
| <b>Amikacin</b>                        | 0 (0/17)               | n/a                        | n/a                | n/a                                      | n/a                 | n/a                                            | n/a                        | n/a                         |
| <b>Amoxicillin</b>                     | 14.7 (268/1,829)       | 8.3 (3/36)                 | 6.7 (31/461)       | 17.7 (3/17)                              | 2.8<br>(16/581)     | 2.1 (13/609)                                   | 0.2 (1/541)                | 0.8 (5/599)                 |
| <b>Amoxicillin-Clavulanic acid**</b>   | 26.6 (98/369)          | 0 (0/22)                   | 14.3 (62/432)      | n/a                                      | 4.5<br>(13/292)     | 8.4 (12/143)                                   | 0 (0/82)                   | 4.8 (4/84)                  |
| <b>Ampicillin</b>                      | 12.0 (114/951)         | 4.2 (1/24)                 | 0 (0/147)          | 30.8 (8/26)                              | 9.6<br>(50/522)     | 23.3<br>(27/116)                               | 0.5 (1/198)                | 9.4 (43/459)                |
| <b>Ampicillin-Cloxacillin**</b>        | 41.7 (80/192)          | 0 (0/2)                    | n/a                | n/a                                      | n/a                 | n/a                                            | 0 (0/2)                    | 0 (0/2)                     |
| <b>Azithromycin</b>                    | 65.6 (21/32)           | 0 (0/25)                   | 0 (0/20)           | n/a                                      | n/a                 | 0 (0/25)                                       | 0 (0/25)                   | 10.7 (3/28)                 |
| <b>Benzylpenicillin (penicillin G)</b> | 13.1 (14/107)          | n/a                        | n/a                | 0 (0/11)                                 | n/a                 | 0 (0/3)                                        | 0 (0/31)                   | 0 (0/1)                     |
| <b>Cefadroxil</b>                      | 0 (0/14)               | n/a                        | n/a                | n/a                                      | n/a                 | n/a                                            | n/a                        | n/a                         |
| <b>Cefalexin</b>                       | 0 (0/10)               | 0 (0/11)                   | n/a                | n/a                                      | n/a                 | n/a                                            | 0 (0/11)                   | 0 (0/11)                    |
| <b>Cefixime</b>                        | 15.2 (10/66)           | 0 (0/37)                   | 5.6 (3/54)         | n/a                                      | 0 (0/55)            | n/a                                            | 0 (0/37)                   | 0 (0/37)                    |
| <b>Cefotaxime</b>                      | 0 (0/21)               | n/a                        | n/a                | n/a                                      | n/a                 | n/a                                            | n/a                        | n/a                         |

|                                             |                |                 |               |            |               |                |              |              |
|---------------------------------------------|----------------|-----------------|---------------|------------|---------------|----------------|--------------|--------------|
| <b>Ceftazidime</b>                          | 0 (0/7)        | n/a             | n/a           | n/a        | n/a           | n/a            | n/a          | n/a          |
| <b>Ceftriaxone</b>                          | 16.5 (47/284)  | 0 (0/26)        | n/a           | 0 (0/35)   | 12.4 (18/145) | 0 (0/38)       | n/a          | 0.7 (1/149)  |
| <b>Cefuroxime</b>                           | 28.3 (51/180)  | 0 (0/8)         | 8.7 (10/115)  | n/a        | 26.6 (30/113) | n/a            | 0 (0/8)      | 8.3 (1/12)   |
| <b>Cephadrine</b>                           | 100 (6/6)      | n/a             | n/a           | n/a        | n/a           | n/a            | n/a          | n/a          |
| <b>Chloramphenicol</b>                      | 31.7 (40/126)  | 18.2 (2/11)     | 14.3 (1/7)    | n/a        | 0 (0/27)      | 0 (0/1)        | 5.3 (2/38)   | 12.1 (4/33)  |
| <b>Ciprofloxacin</b>                        | 14.8 (116/783) | 8.3 (152/1,836) | 1.1 (3/276)   | n/a        | 5.5 (12/220)  | 1.0 (18/1,808) | 2.4 (13/538) | 3.2 (10/311) |
| <b>Clarithromycin</b>                       | 5.1 (5/98)     | 0 (0/3)         | 28.4 (25/88)  | n/a        | 8.6 (8/93)    | n/a            | 0 (0/3)      | 25.0 (1/4)   |
| <b>Clindamycin</b>                          | 66.7 (4/6)     | n/a             | 16.7 (1/6)    | n/a        | n/a           | 0 (0/6)        | n/a          | n/a          |
| <b>Cloxacillin</b>                          | 40 (10/25)     | 0 (0/26)        | 0 (0/5)       | n/a        | 0 (0/7)       | 28.6 (2/7)     | 0 (0/31)     | 8.8 (3/34)   |
| <b>Doxycycline</b>                          | 20.1 (68/339)  | 0 (0/10)        | 1.8 (4/217)   | 0 (0/8)    | 3.1 (8/255)   | 0 (0/182)      | 1.3 (2/157)  | 0.6 (1/180)  |
| <b>Erythromycin</b>                         | 48.3 (28/58)   | 8.4 (13/154)    | 69.2 (9/13)   | n/a        | 0 (0/5)       | 5.0 (1/20)     | 5.8 (9/154)  | 18.6 (8/43)  |
| <b>Flucloxacillin</b>                       | 85.7 (18/21)   | n/a             | n/a           | n/a        | n/a           | 0 (0/1)        | n/a          | 0 (0/4)      |
| <b>Gentamicin</b>                           | 9.8 (22/225)   | n/a             | 0 (0/1)       | n/a        | 0 (0/1)       | 0 (0/30)       | 0 (0/1)      | 1.9 (3/157)  |
| <b>Kanamycin</b>                            | 0 (0/67)       | 33.3 (1/3)      | n/a           | n/a        | n/a           | 0 (0/67)       | n/a          | 0 (0/67)     |
| <b>Levofloxacin</b>                         | 14.7 (26/177)  | 0 (0/12)        | 29.7 (19/64)  | n/a        | n/a           | 0 (0/2)        | 6.3 (1/16)   | 0 (0/10)     |
| <b>Metronidazole</b>                        | 19.7 (146/741) | 0 (0/40)        | 5.5 (15/274)  | n/a        | 8.4 (36/430)  | 1.2 (5/416)    | 3.0 (11/363) | 0.6 (2/351)  |
| <b>Moxifloxacin</b>                         | n/a            | 0 (0/5)         | n/a           | n/a        | n/a           | 0 (0/2)        | 0 (0/5)      | 0 (0/3)      |
| <b>Nalidixic acid</b>                       | 0 (0/9)        | n/a             | 66.7 (6/9)    | n/a        | 0 (0/9)       | n/a            | n/a          | n/a          |
| <b>Norfloxacin</b>                          | 0 (0/1)        | n/a             | 0 (0/1)       | n/a        | 0 (0/1)       | n/a            | 0 (0/1)      | 0 (0/1)      |
| <b>Ofloxacin</b>                            | 10.7 (20/187)  | 0 (0/8)         | 14.9 (15/101) | 1.9 (1/53) | 18.0 (16/89)  | 0 (0/54)       | 8.3 (1/12)   | 0 (0/20)     |
| <b>Oxacillin</b>                            | 0 (0/2)        | n/a             | 0 (0/2)       | n/a        | 0 (0/2)       | n/a            | 0 (0/2)      | 0 (0/2)      |
| <b>Penicillin - unspecified formulation</b> | 7.1 (1/14)     | 0 (0/6)         | n/a           | n/a        | 7.1 (1/14)    | 0 (0/6)        | 5.0 (1/20)   | 0 (0/14)     |

|                                                                 |                  |              |               |           |               |               |              |                |
|-----------------------------------------------------------------|------------------|--------------|---------------|-----------|---------------|---------------|--------------|----------------|
| <b>Phenoxymethylpenicillin (penicillin V)</b>                   | 19.8 (43/217)    | 0 (0/11)     | 1.0 (1/103)   | n/a       | 0 (0/3)       | 2.4 (1/42)    | 0 (0/45)     | 0 (0/44)       |
| <b>Procaine Benzylpenicillin (penicillin G) - intramuscular</b> | 2.9 (3/102)      | n/a          | n/a           | 0 (0/5)   | 0 (0/5)       | 0 (0/5)       | n/a          | 0 (0/10)       |
| <b>Roxithromycin</b>                                            | 5.6 (4/71)       | n/a          | 29.8 (17/57)  | n/a       | 0 (0/57)      | n/a           | n/a          | n/a            |
| <b>Streptomycin</b>                                             | 52.6 (10/19)     | n/a          | n/a           | n/a       | n/a           | n/a           | n/a          | n/a            |
| <b>Sulfamethoxazole-Trimethoprim**</b>                          | 19.9 (397/2,093) | 4.8 (4/84)   | 12.9 (72/558) | 0 (0/180) | 0.5 (4/774)   | 1.6 (10/647)  | 2.4 (19/781) | 5.8 (75/1,286) |
| <b>Sulfamethoxazole-Uncombined</b>                              | n/a              | 0 (0/1)      | n/a           | n/a       | n/a           | n/a           | 0 (0/1)      | 0 (0/1)        |
| <b>Tetracycline</b>                                             | 3.4 (29/842)     | 6.3 (24/382) | 0.8 (2/250)   | 0 (0/11)  | 19.9 (43/216) | 10.5 (40/382) | 5.4 (10/187) | 9.1 (22/242)   |

\* Samples are often subjected to more than one test technique within each category. Numbers represent testing events per API sample

\*\* Combination antibiotics were usually tested twice for API content, once for each ingredient. However, some authors analysed only one of the APIs or an uneven number of them

\*\*\* Includes disintegration, friability, hardness, thickness, wetting time and water absorption testing

\*\*\*\* Includes API identification, degradation products, pH, and other undeclared chemical tests
